# Supplementary material
Source: PubMed Central journal article supplement (PMC2782277)
Supplement: tpc.109.070060_1.pdf [file tpc.109.070060_1.pdf]

Supplemental Data. Tamada et al. (2009). *ARABIDOPSIS TRITHORAX-RELATED 7* is required for methylation of lysine 4 of histone H3 and for transcriptional activation of *FLOWERING LOCUS C*

**Supplemental Table 1.** *atx* Mutant Lines Analyzed in the Manuscript

| Gene         | Locus     | Mutant name <sup>a</sup> | Line name          | miscellaneous <sup>b</sup> |
|--------------|-----------|--------------------------|--------------------|----------------------------|
| <i>ATX1</i>  | At2g31650 | <i>atx1-2</i> *          | SALK_149002        | Pien et al., 2008          |
|              |           | <i>atx1-3</i> *          | SALK_119016C       |                            |
| <i>ATX2</i>  | At1g05830 | <i>atx2-1</i>            | SALK_074806        | Pien et al., 2008          |
|              |           | <i>atx2-2</i>            | SALK_117262        | Saleh et al., 2008         |
|              |           | <i>atx2-3</i> *          | GABI_057B09        |                            |
| <i>ATX3</i>  | At3g61740 | <i>atx3-1</i>            | SAIL_255_F11       |                            |
|              |           | <i>atx3-2</i> *          | SAIL_582_H12       |                            |
| <i>ATX4</i>  | At4g27910 | <i>atx4-1</i>            | SAIL_1247_E09      |                            |
|              |           | <i>atx4-2</i> *          | SALK_060156        |                            |
| <i>ATX5</i>  | At5g53430 | <i>atx5-1</i>            | WiscDsLox461-46418 |                            |
|              |           | <i>atx5-2</i> *          | SAIL_705_H05       |                            |
| <i>ATXR1</i> | At1g26760 | <i>atxr1-1</i> *         | GABI_721A04        |                            |
|              |           | <i>atxr1-2</i>           | GABI_355F02        |                            |
|              |           | <i>atxr1-3</i>           | SALK_117606        |                            |
|              |           | <i>atxr1-4</i>           | SALK_028842        |                            |
| <i>ATXR2</i> | At3g21820 | <i>atxr2-1</i>           | SAIL_600_E07       |                            |
|              |           | <i>atxr2-2</i> *         | SALK_026154        |                            |
|              |           | <i>atxr2-3</i>           | WiscDsLox471C3     |                            |
| <i>ATXR3</i> | At4g15180 | <i>atxr3-1</i> *         | WiscDsLox361D10    |                            |
|              |           | <i>atxr3-2</i>           | GABI_489F05        |                            |
|              |           | <i>atxr3-3</i>           | SALK_021008        |                            |
| <i>ATXR4</i> | At5g06620 | <i>atxr4-1</i> *         | SALK_065711C       |                            |
|              |           | <i>atxr4-2</i>           | SALK_117779        |                            |
| <i>ATXR7</i> | At5g42400 | <i>atxr7-1</i> *         | SALK_149692        |                            |
|              |           | <i>atxr7-2</i> *         | SAIL_446_F12       |                            |
|              |           | <i>atxr7-3</i>           | FLAG_370G04        | Ws background              |

<sup>a</sup>Asterisks beside the mutant name indicate the lines into which active *FRI* locus was introgressed.

<sup>b</sup>*atx1-2*, *atx2-1* and *atx2-2* were previously described in the noted papers. Except for *atxr7-3* in the Ws background, all of the mutants are in the Col background.

**Supplemental Table 2.** Primers for Realtime PCR

| Gene             | Locus | Forward primer (5' to 3')       | Reverse primer (5' to 3')     |
|------------------|-------|---------------------------------|-------------------------------|
| <b>1, RT-PCR</b> |       |                                 |                               |
| <i>FLC</i>       |       | CCGAACTCATGTTGAAGCTTGTTGAG      | CGGAGATTTGTCCAGCAGGTG         |
| <i>FLM</i>       |       | GGAAAGAATACGTTGCTGGCAACA        | CCGTTGATGATGGTGGCTAATTGA      |
| <i>MAF2</i>      |       | CGAAATACATCATGCTGATGAACTTG      | GCTTTGGACTATTTCTAGTAACTCTTGA  |
| <i>MAF3</i>      |       | GGAAATAAAGGTAAAACAAAACGAAGCTCTT | GAACTCTGATATTTGTCTACTAAGGTACA |
| <i>MAF4</i>      |       | GATGGGGAAGATGAAGAAGTCTGT        | AGTCTCCGGTGGCTTGTGT           |
| <i>MAF5</i>      |       | GAAACAGGGGATGAAAGAGCAGTA        | TGGGCTGTGGCCAGAGCTAT          |
| <i>CO</i>        |       | GCTCCTCAGGGACTCACTAC            | CTCCGGCACAACACCAGTTTC         |
| <i>ACT2</i>      |       | GGTAACATTGTGCTCAGTGGTGG         | AACGACCTTAATCTTCATGCTGC       |
| <b>2, ChIP</b>   |       |                                 |                               |
| <i>FLC</i>       | 1     | AGCAGTGGCGGATCCAAGAA            | CCCCACATCAATCCAAGTTCA         |
|                  | 2     | GCTGATACAAGCATTTCACCAAA         | CTTAAATGTCCACACATATGGCAAT     |
|                  | 3     | GTATCGTAGGGGAGGAAAGA            | GAAGACAAGATTGCCACGTGTA        |
|                  | 4     | GAAAGAAATAAAGCGAGAAAAGGAA       | GGCTTTGTGCCCTAATTTGAT         |
|                  | 5     | GTTGTTTCTCGGTTCTGTGT            | GCTAAAAAGCTTCTTCACGACAT       |
|                  | 6     | GTGGACCTATTACTTGGTGATT          | GCTGAGTTTTTTGAAGCTACCAA       |
|                  | 7     | CAATCTTTTGTGTGAAAATCGACAA       | ACAAGGCTGTGTGAATGACAA         |
|                  | 8     | GAGGCTTATGTTTAGGGTTCTT          | GAAAAGTCATACAAAGGCATACAGAT    |
|                  | 9     | CGGTTGTTGGACATAACTAGGTT         | CAAACCCAGACTTAACCAGACT        |
|                  | 10    | CTTAAGTAGACGGAATAAGTCAA         | TACTACTCAAGATCTCGATGCAA       |
| <i>Ta3</i>       |       | TGGGGCTCTCCAAATGTAAC            | GGCTTTTCCACTCACAAAACCTT       |

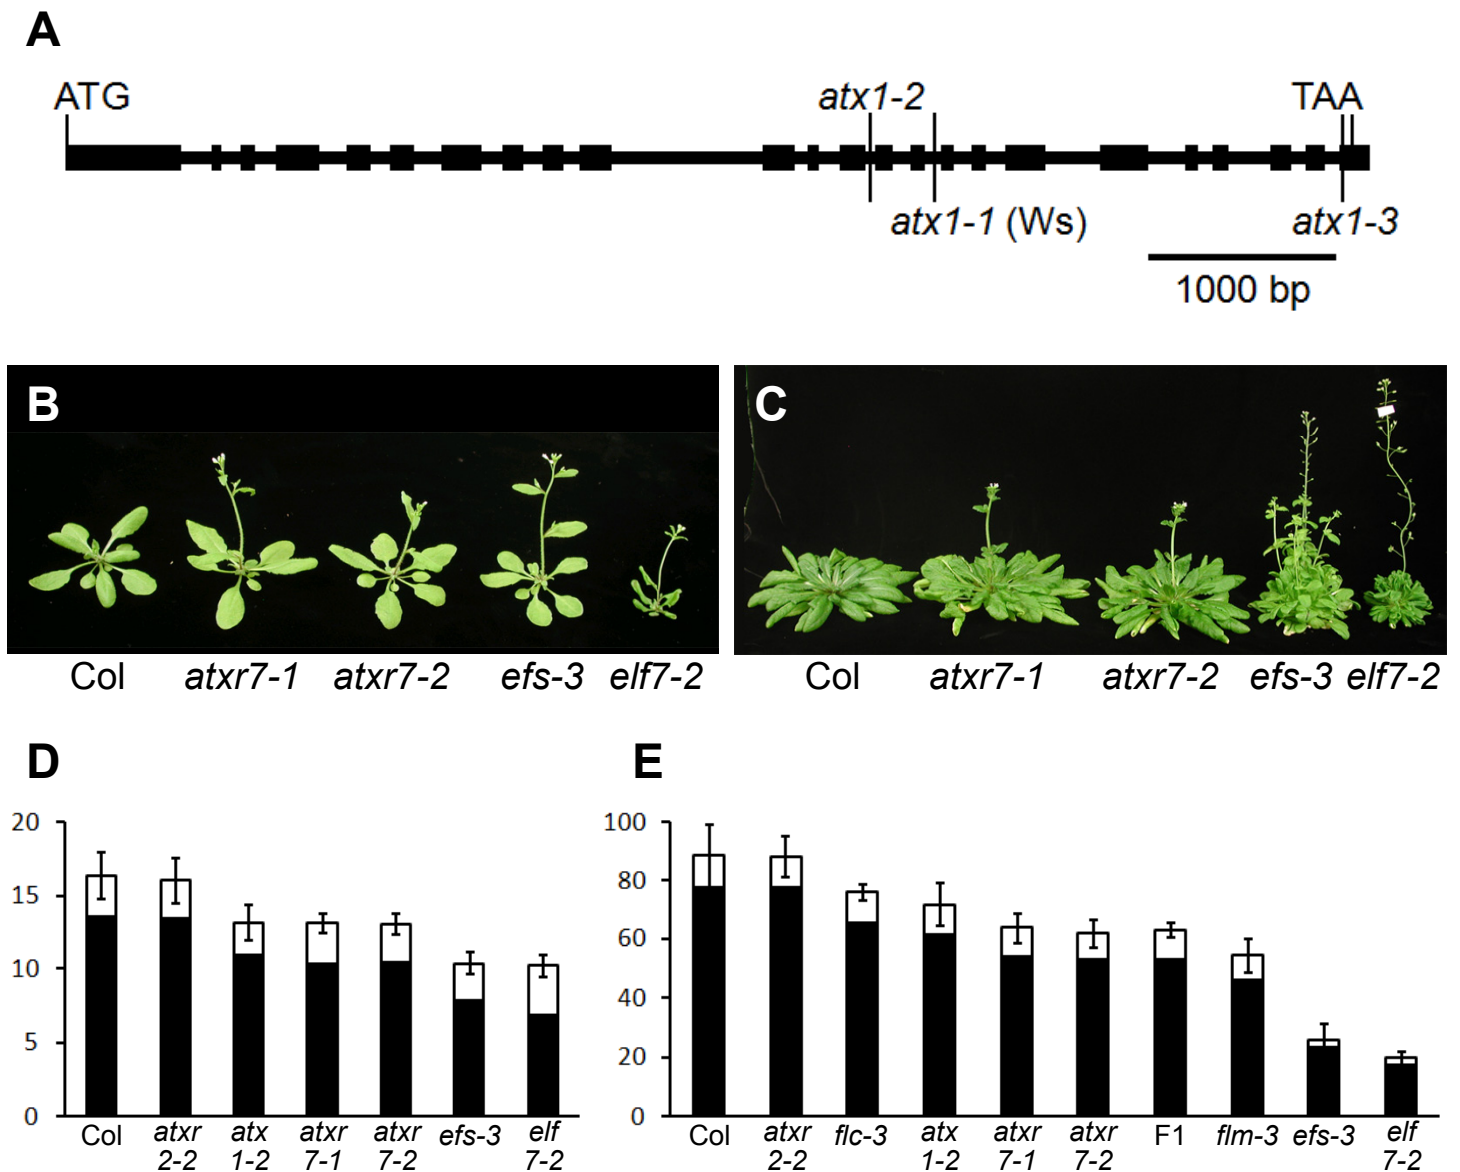

### Supplemental Figure 1. Flowering Phenotype of H3K4 Methylase Mutants

**(A)** *ATX1* gene structure and T-DNA insertion sites. Thick and thin lines indicate exons and introns, respectively. *atx1-2* and *atx1-3* are in the Col background.

**(B)** and **(C)** Representative plants of Col, *atxr7-1*, *atxr7-2*, *efs-3* and *elf7-2* grown in long days (**[B]**, 23 days old) or short days (**[C]**, 10 weeks old).

**(D)** and **(E)** Primary leaf number at flowering of *atx* and typical early flowering mutants grown in long days (**(D)**) or short days (**(E)**). *atxr2-2* is a negative control which did not show any flowering phenotype. F1 indicates F1 plants whose parents are *atxr7-1* and *atxr7-2* mutants. Closed and open bars indicate rosette and cauline leaves, respectively. Bars indicate standard deviation.

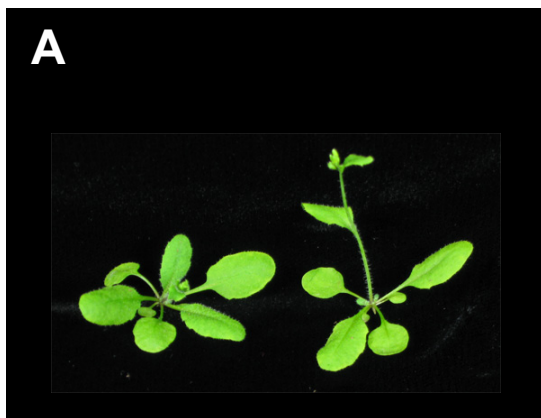

Ws      *atxr7-3*

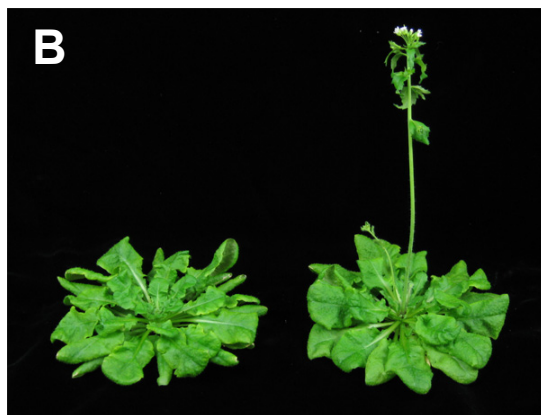

Ws      *atxr7-3*

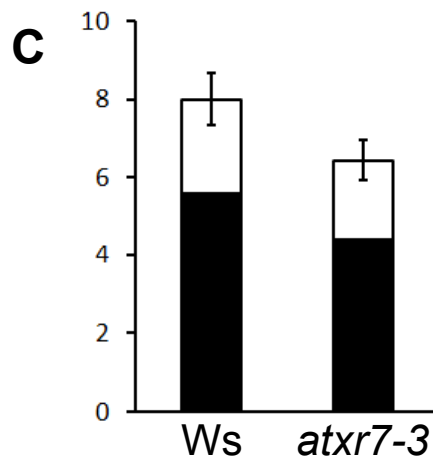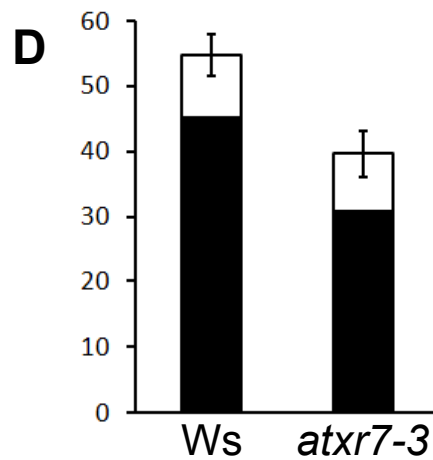

**Supplemental Figure 2. Flowering Phenotype of *atxr7* in the Ws Background**

(A) and (B) Representative plants of Ws and *atxr7-3* grown in long days ([A], 3 weeks old) or in short days ([B], 10 weeks old).

(C) and (D) Primary leaf number at flowering of Ws and *atxr7-3* grown in long days (C) or in short days (D). Closed and open bars indicate rosette and cauline leaves, respectively. Bars indicate standard deviation.

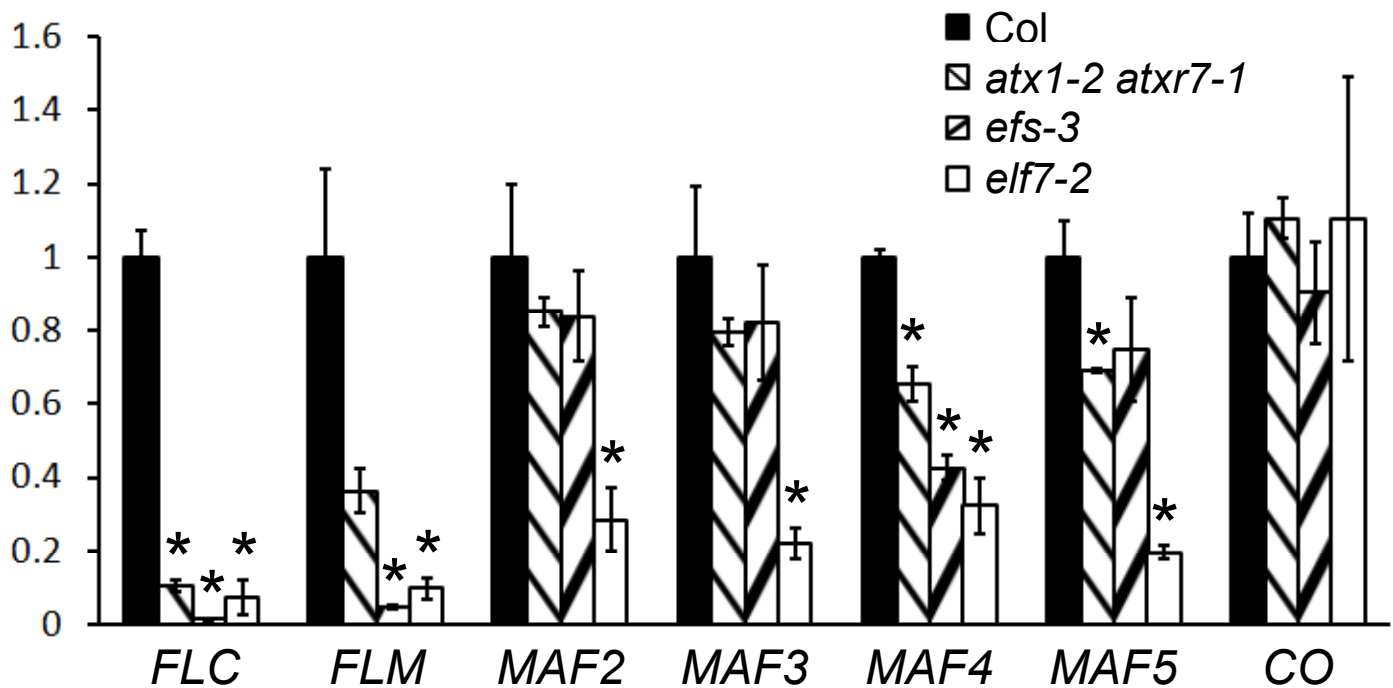

**Supplemental Figure 3.** mRNA Levels of *FLC* and *FLC*-Related Family Genes in *atx1-2 atxr7-1*, *efs-3* and *elf7-2* Mutants

Real-time PCR was performed to analyze the expression level. The averages of the results from 3 different biological replicates are shown. Each experiment was normalized to *ACTIN2* expression. Bars indicate the standard error. Asterisks beyond the bars indicates the significant difference in the expression of the genes between Col and mutants ( $p < 0.05$ ).

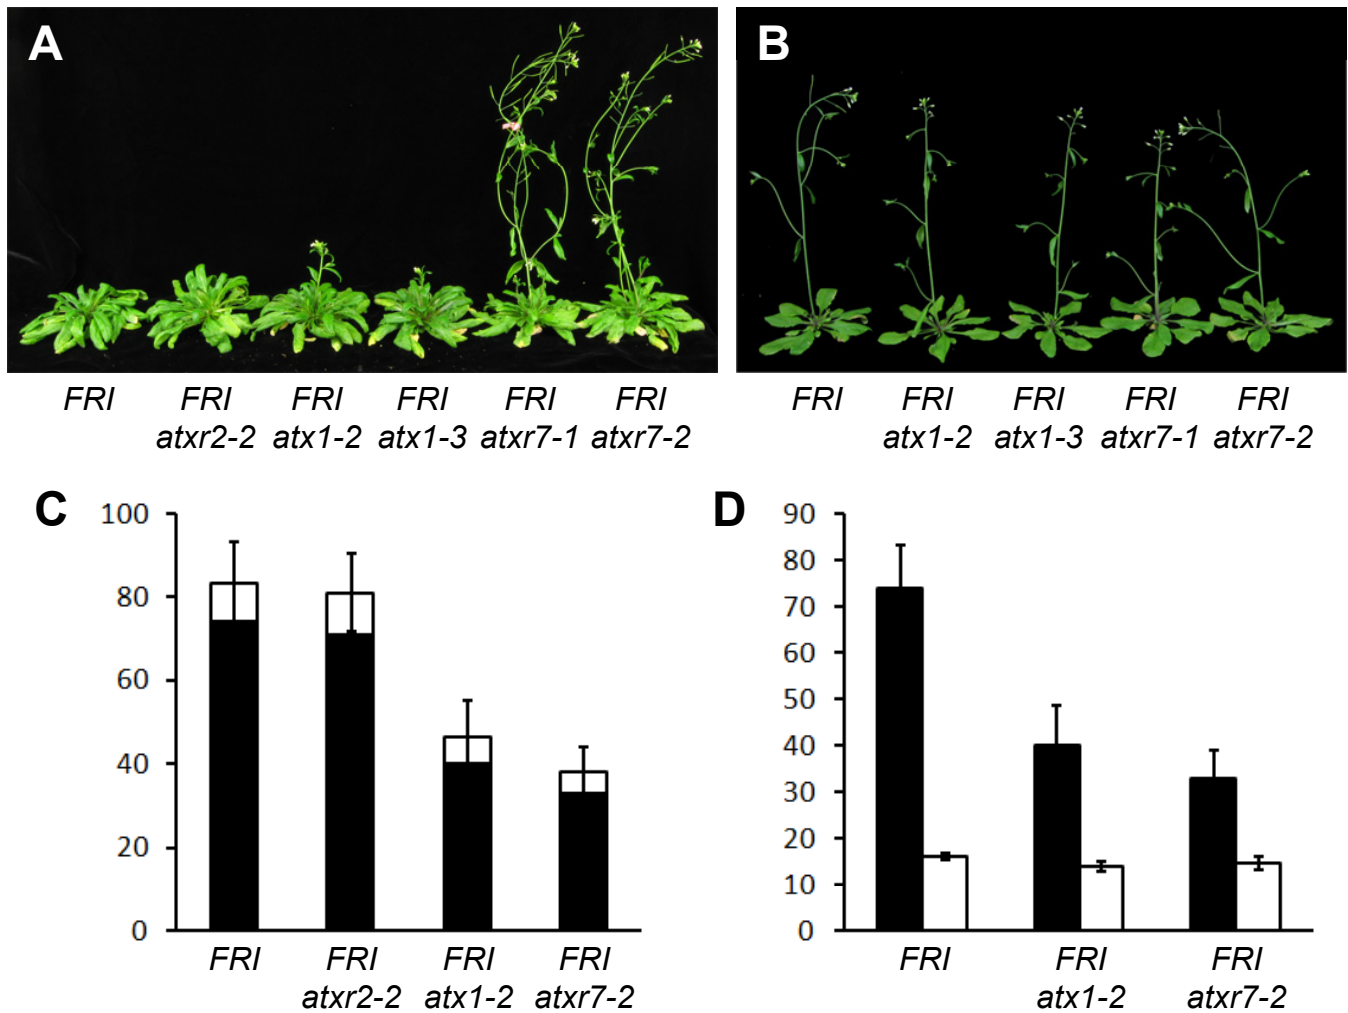

#### Supplemental Figure 4. Effect of Vernalization on H3K4 Methylase Mutants

**(A)** Representative 7-week-old plants of *FRI*-Col, *FRI atxr2-2*, *FRI atx1-2*, *FRI atx1-3*, *FRI atxr7-1* and *FRI atxr7-2* grown in long days. Same plants in Figure 3A (*FRI*-Col, *FRI atx1-2* and *FRI atxr7-2*) are presented. *atxr2-2* is a negative control which did not suppress or accelerate the delayed-flowering phenotype caused by *FRI*.

**(B)** Representative 7-week-old plants of *FRI*-Col, *FRI atx1-2*, *FRI atx1-3*, *FRI atxr7-1* and *FRI atxr7-2* grown in long days with vernalization (40 days of 4 °C exposure).

**(C)** Primary leaf number at flowering of *FRI*-Col, *FRI atxr2-2*, *FRI atx1-2* and *FRI atxr7-2* grown in long days. Closed and open bars indicate rosette and cauline leaves, respectively. Bars indicate standard deviation.

**(D)** Primary rosette leaf number at flowering of *FRI*-Col, *FRI atx1-2* and *FRI atxr7-2* grown in long days with (open bar) or without (closed bar) vernalization. Bars indicate standard deviation.

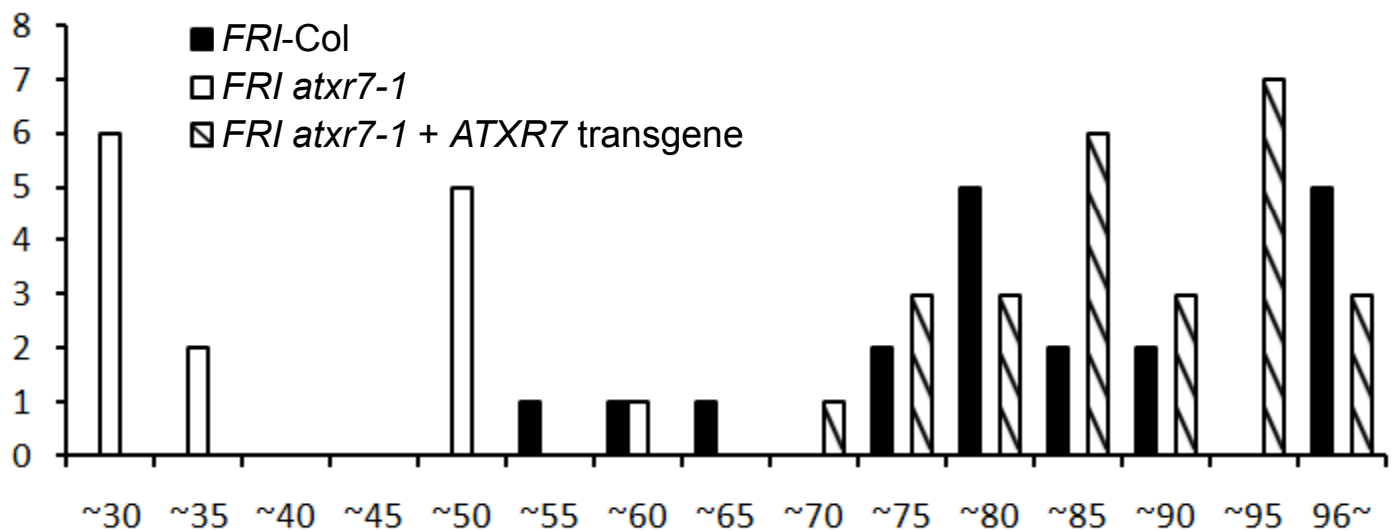

**Supplemental Figure 5.** Rapid Flowering Phenotype Caused by the *atxr7* Lesion Is Rescued by an *ATXR7* Transgene

The X- and Y-axis indicate rosette leaf number and the number of the plants of *FRI-Col* (closed bar, n = 19), *FRI atxr7-1* (open bar, n = 14) and different T1 transformants of *FRI atxr7-1* *ATXR7pro:ATXR7-FLAG* (hatched bar, n = 26).
